# Supplementary material for: Machine Learning–Based Prognostic Model for Patients After Lung Transplantation
Source: PubMed Central journal article supplement (PMC10163387; doi:10.1001/jamanetworkopen.2023.12022), 2023-05-05
Supplement: jamanetwopen-e2312022-s001.pdf [file jamanetwopen-e2312022-s001.pdf]

## Supplemental Online Content

Tian D, Yan HJ, Huang H, et al. Machine learning–based prognostic model for patients after lung transplantation. *JAMA Netw Open*. 2023;6(5):e2312022.  
doi:10.1001/jamanetworkopen.2023.12022

**eMethods.** Additional Information About Data Collection, Model Development, and Model Validation

**eTable 1.** Overall Survival Rate for Patients After Lung Transplantation

**eTable 2.** Predicted Value by RSF Model in Patients With Different Survival Statuses

**eTable 3.** Subgroup Tests for the RSF Model

**eTable 4.** The Performance of RSF Model in 2 Conditions

**eTable 5.** The Performance of Cox Regression Model Based on Stepwise Selection

**eFigure 1.** The Flowchart of Patient Enrollment

**eFigure 2.** Calibration of the Random Survival Forest Model

**eFigure 3.** Consecutive Performance of the RSF and Cox Model

**eFigure 4.** Subgroup Tests for Prognostic Stratification Ability of the Random Survival Forest Model

This supplemental material has been provided by the authors to give readers additional information about their work.

## **eMethods. Additional Information About Data Collection, Model Development, and Model Validation**

### **Data Collection**

A total of 22 characteristics, consisting of 4 recipient factors, 1 donor factor, 4 transplant procedural factors, and 13 posttransplant factors, were collected as follows: age, sex, body mass index (BMI), diagnosis, donor arterial oxygen tension/inspired oxygen fraction (PaO<sub>2</sub>/FiO<sub>2</sub>), surgical type, surgical approach, operation time, cold-ischemia time, intensive care unit (ICU) stay, extracorporeal membrane oxygenation (ECMO) type, postoperative ECMO time, preoperative hormone use, grade 3 primary graft dysfunction at 72 h (72 h PGD3), postoperative ventilator time, multidrug-resistant bacterial infection, 6-minute walking test (6MWT), forced expiratory volume at the first second (FEV<sub>1</sub>), FEV<sub>1</sub> percent predicted (FEV<sub>1</sub>%), forced vital capacity (FVC), FVC percent predicted (FVC%), and FEV<sub>1</sub>/FVC. Our center prefers a double lung transplant for patients with pulmonary infection and severe pulmonary hypertension. The ECMO type consists of two categories: veno-venous cannulation ECMO and veno-arterial cannulation ECMO. Veno-veno-arterial cannulation ECMO is a variant of veno-arterial ECMO and is categorized as such. The maintenance hormone treatment is preoperatively applied to patients according to the original disease condition. MRBI is defined as a bacterial infection that is resistant to multiple antibiotics and causes symptoms. The 6MWT and pulmonary function data were collected from the first examination within 6 months post-transplantly.

### **Model Development**

The grid search method was used for hyperparameter tuning (including number of trees, number of variables to possibly split at each node, and minimum size of terminal node). The bootstrapping resampling method was used to estimate the performance of models fitted by each parameter combination.

### **Model Validation**

The integrated area under the curve (iAUC) of the time-dependent receiver operator characteristic curve (ROC) was used to evaluate the continuous model's discrimination ability. The higher the iAUC of a model, the better its performance in discriminating patients with different outcome statuses. The integrated Brier score (iBS) was applied to estimate the continuous calibration ability of the models. The iBS ranges from 0 to 1, and an iBS of prediction model close to 0 indicates excellent calibration. The iAUC and iBS were estimated from 1 to 48 months at 1-month intervals. Model performance at specific time points (1 month and 1 year) was assessed by the time-dependent area under the curve (tAUC) and prediction error (PE). Meanwhile, the calibration was visualized as a curve between observed survival and predicted survival.

**eTable 1. Overall Survival Rate for Patients After Lung Transplantation**

| <b>Survival rates <sup>a</sup></b> | <b>All patients</b> | <b>Conditional on survival to 1 month</b> | <b>Conditional on survival to 1 year</b> |
|------------------------------------|---------------------|-------------------------------------------|------------------------------------------|
| 30-day mortality                   | 21.6%               | -                                         | -                                        |
| 1-year survival                    | 64.9%               | 82.8%                                     | -                                        |
| 3-year survival                    | 55.5%               | 70.8%                                     | 85.5%                                    |
| 5-year survival                    | 48.8%               | 62.3%                                     | 75.2%                                    |

<sup>a</sup> Survival rates were estimated by the Kaplan-Meier method.

**eTable 2. Predicted Value by RSF Model in Patients With Different Survival Statuses**

|                                  | <b>Mean</b> | <b>SD</b> | <b>Median</b> | <b>IR</b>    | <b>P value</b>   |
|----------------------------------|-------------|-----------|---------------|--------------|------------------|
| <b>1-month survival statuses</b> |             |           |               |              |                  |
| <b>Survival</b>                  | 25.93       | 19.98     | 18.94         | 11.23, 37.01 | <i>P</i> < 0.001 |
| <b>Death</b>                     | 55.54       | 17.57     | 58.83         | 42.58, 69.71 | Ref              |
| <b>1-year survival statuses</b>  |             |           |               |              |                  |
| <b>Survival</b>                  | 20.84       | 15.58     | 16.30         | 10.32, 29.37 | <i>P</i> < 0.001 |
| <b>Death</b>                     | 55.45       | 17.33     | 58.97         | 44.03, 69.48 | Ref              |

Abbreviations: SD, standard deviation; IR, interquartile range.

**eTable 3. Subgroup Tests for the RSF Model**

| <b>Subgroups</b> | <b>iAUC (95% CI)</b> | <b>iBS (95% CI)</b>  |
|------------------|----------------------|----------------------|
| SLTx recipients  | 0.861 (0.773, 0.930) | 0.159 (0.118, 0.193) |
| DLTx recipients  | 0.896 (0.837, 0.941) | 0.096 (0.071, 0.125) |
| IPF patients     | 0.885 (0.817, 0.939) | 0.143 (0.111, 0.178) |
| COPD patients    | 0.809 (0.606, 0.928) | 0.150 (0.084, 0.201) |

Abbreviations: iAUC, integrated area under the curve; iBS, integrated brier score.

**eTable 4. The Performance of RSF Model in 2 Conditions**

| <b>Models</b>                                                  | <b>Time of prediction</b> | <b>Selected variables</b>                                                                                                                                                                                                                                 | <b>iAUC</b>             | <b>iBS</b>              |
|----------------------------------------------------------------|---------------------------|-----------------------------------------------------------------------------------------------------------------------------------------------------------------------------------------------------------------------------------------------------------|-------------------------|-------------------------|
| RSF model<br>(excluded lung<br>function test and<br>6MWT data) | 1 to 48 months            | ICU stay, Postoperative ventilator time,<br>Postoperative ECMO time, Age, Operation<br>time, 72h PGD 3, Donor PaO <sub>2</sub> /FiO <sub>2</sub> , BMI,<br>Diagnosis, Cold ischemia time, Surgical<br>approach, Multidrug-resistant bacteria<br>infection | 0.800<br>(0.693, 0.856) | 0.173<br>(0.151, 0.196) |
| RSF model<br>(excluded<br>patients dead<br>within 1 month)     | 3 to 48 months            | Postoperative ventilator time, ICU stay,<br>6MWT, FVC%, Postoperative ECMO time,<br>FEV1%, FEV1/FVC, FEV1, FVC, Age,<br>Operation time, BMI, Donor PaO <sub>2</sub> /FiO <sub>2</sub> ,<br>Diagnosis, Surgical approach, Cold<br>ischemia time, ECMO type | 0.834<br>(0.752, 0.897) | 0.143<br>(0.114, 0.174) |

Abbreviations: RSF, random survival forests; ICU, intensive care unit; ECMO, extracorporeal membrane oxygenation; 72 h PGD3, grade 3 primary graft dysfunction at 72h; PaO<sub>2</sub>/FiO<sub>2</sub>, arterial oxygen tension/inspired oxygen fraction; BMI, body mass index; 6MWT, 6-minute walking test; FEV1, forced expiratory volume in 1 second; FEV1%, percentage of predicted forced expiratory volume in 1-second value; FVC, forced vital capacity; FVC%, percentage of predicted forced vital capacity value; iAUC, integrated area under the curve; iBS, integrated brier score.

**eTable 5. The Performance of Cox Regression Model Based on Stepwise Selection**

| <b>Selected variables</b> <sup>a</sup>                                                                                                                     | <b>iAUC</b> | <b>iBS</b> | <b>P value</b> <sup>b</sup> |
|------------------------------------------------------------------------------------------------------------------------------------------------------------|-------------|------------|-----------------------------|
| Age, Diagnosis, Surgical approach, Operation time, Postoperative ECMO time, ICU stay, FEV1, FVC, FVC%, 72h PGD 3, Donor PaO <sub>2</sub> /FiO <sub>2</sub> | 0.662       | 0.201      | <0.001                      |

Abbreviations: iAUC, integrated area under the curve; iBS, integrated brier score.

<sup>a</sup> The stepwise selection determined 11 factors to develop this Cox regression model.

<sup>b</sup> Comparison with the performance of Cox model to RSF model with the same time of prediction.

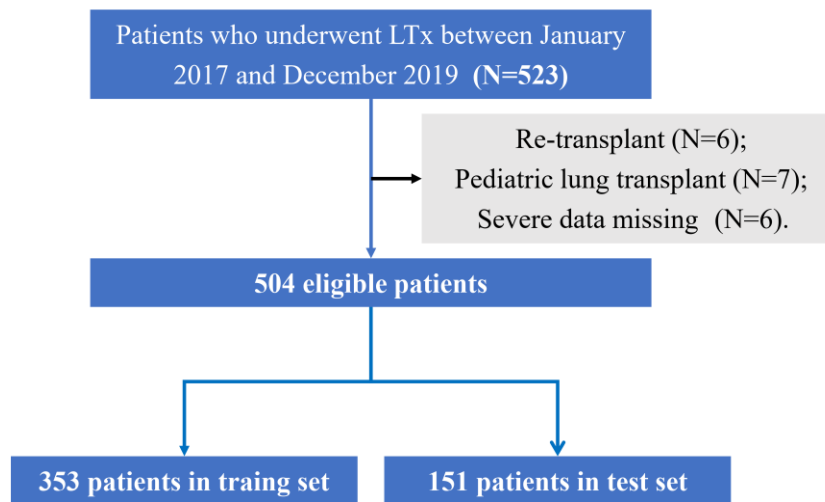

**eFigure 1. The Flowchart of Patient Enrollment**

Out of 523 patients after LTx, 6 patients with re-transplant, 7 with a pediatric lung transplant, and 6 with severe data missing were excluded from this study. Eventually, 504 patients were eligible and included in the analysis.



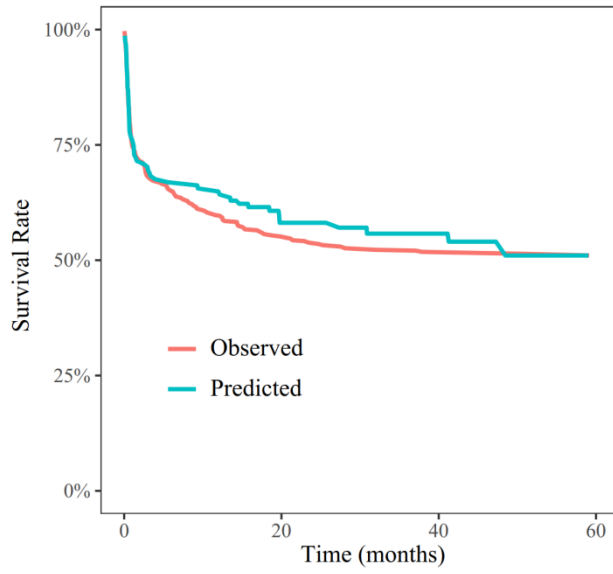

**eFigure 2. Calibration of the Random Survival Forest Model**

The predicted survival rate of the random survival forest model showed an excellent agreement with the observed survival rate.

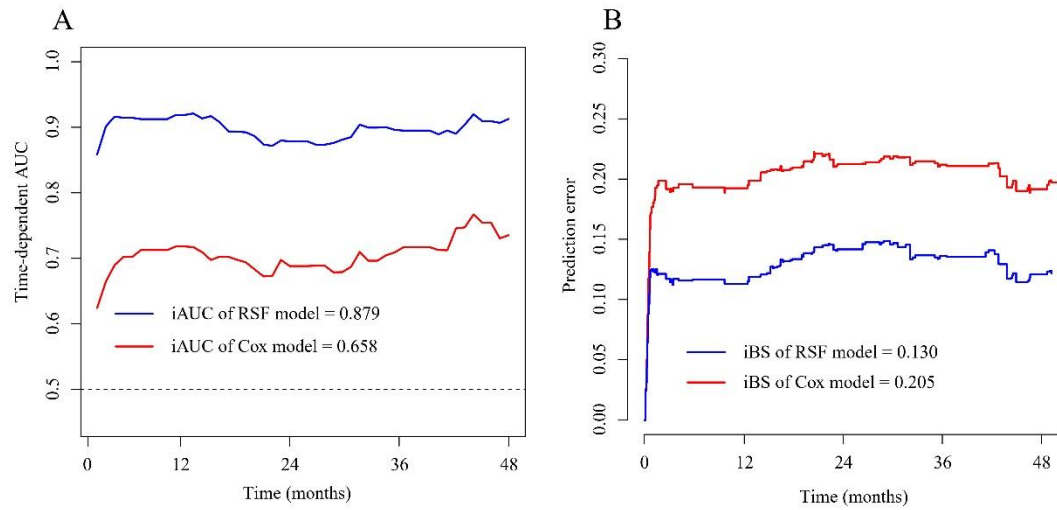

### eFigure 3. Consecutive Performance of the RSF and Cox Model

Regarding discrimination (A) or calibration (B), the RSF model is superior to the Cox model from 1 month to 48 months.

Abbreviations: iAUC, integrated area under the curve; RSF, random survival forests; iBS, integrated brier score.

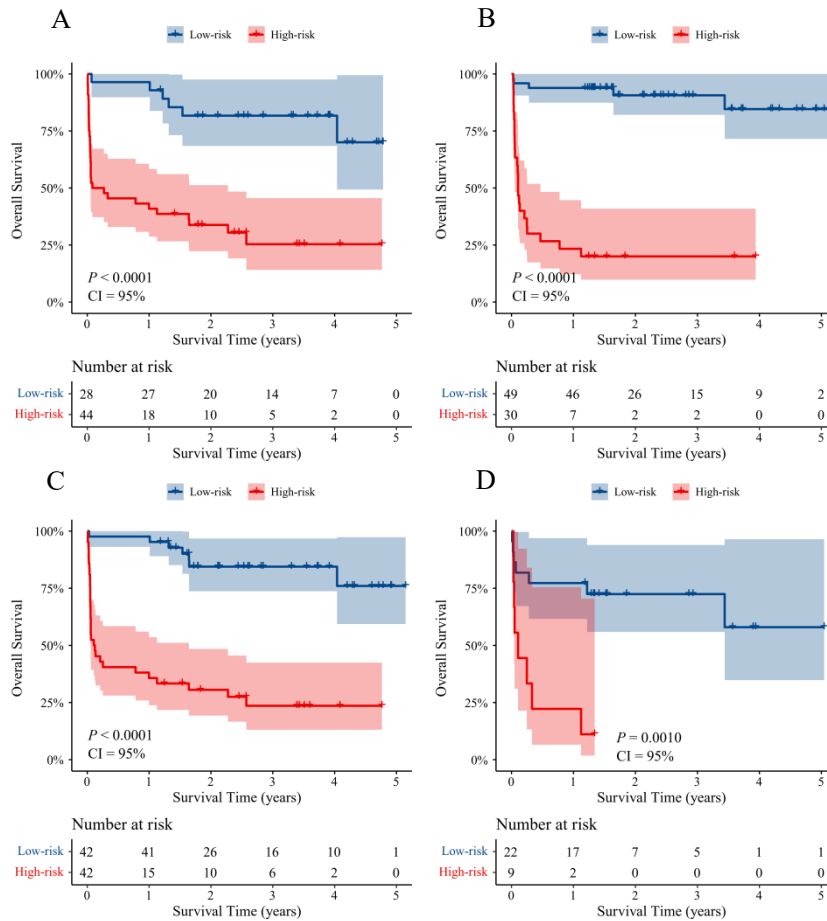

**Figure 4. Subgroup Tests for Prognostic Stratification Ability of the Random Survival Forest Model**

Within the test set, the random survival forest model divided patients with single lung transplantation (A), double lung transplantation (B), interstitial pulmonary fibrosis (C), and chronic obstructive pulmonary diseases (D) to low- or high-risk of poor survival with significant differences (all  $P < 0.05$ ).
