# Supplementary material for: Machine Learning–Based Prognostic Model for Patients After Lung Transplantation
Source: PubMed Central journal article supplement (PMC10163387; doi:10.1001/jamanetworkopen.2023.12022), 2023-05-05
Supplement: jamanetwopen-e2312022-s002.pdf [file jamanetwopen-e2312022-s002.pdf]

## Data Sharing Statement

Tian. Machine Learning-Based Prognostic Model for Patients After Lung Transplantation. *JAMA Netw Open*. Published May 05, 2023. doi:10.1001/jamanetworkopen.2023.12022

### Data

**Data available:** Yes

**Data types:** Deidentified participant data

**How to access data:** We will provide deidentified data, if individual request it. Email: [chenjy@wuxiph.com](mailto:chenjy@wuxiph.com) or [shilingzhi1979@126.com](mailto:shilingzhi1979@126.com).

**When available:** With publication

### Supporting Documents

**Document types:** Statistical/analytic code

**How to access documents:** We will provide deidentified data, if individual request it. Email: [chenjy@wuxiph.com](mailto:chenjy@wuxiph.com) or [shilingzhi1979@126.com](mailto:shilingzhi1979@126.com).

**When available:** With publication

### Additional Information

**Who can access the data:** Our data will be available to researchers whose proposed use of the data has been approved.

**Types of analyses:** Our data will be available for the purpose of performing a pooled analysis.

**Mechanisms of data availability:** Our data would be available if the requester signed a data access agreement.
